## **Epigenetic clocks and risk assessment in adult spinal deformity: A novel association between pace of aging with frailty, disability, and postoperative complications**

Michael M. Safaee MD\*<sup>1</sup>, Varun B. Dwaraka PhD\*<sup>2</sup>, Justin M. Lee BA<sup>3</sup>, Marissa Fury BS<sup>3</sup>, Tavis L Mendez PhD<sup>2</sup>, Ryan Smith BS<sup>2</sup>, Jue Lin PhD<sup>4</sup>, Dana L. Smith MS<sup>4</sup>, John F. Burke MD<sup>3</sup>, Justin K. Scheer MD<sup>3</sup>, Hannah Went BS<sup>2</sup>, Christopher P. Ames MD<sup>3,5</sup>

1 Department of Neurological Surgery, University of Southern California, Los Angeles, CA, USA

2 TruDiagnostic, Lexington, KY, USA

3 Department of Neurological Surgery, University of California, San Francisco, San Francisco, CA, USA

4 Department of Biochemistry and Biophysics, University of California, San Francisco, San Francisco, CA, USA

5 Department of Orthopedic Surgery, University of California, San Francisco, San Francisco, CA, USA

\*Both authors contributed equally

### **Corresponding author**

Michael Safaee, MD

Assistant Professor of Neurological Surgery

University of Southern California

Phone: 818-693-4242

Fax: 323-442-5301

Email: michael.safaee@med.usc.edu

**Key words:** epigenetics, biological age, chronological age, risk assessment, spine surgery

**Abstract word count:** 359

**Text word count:** 3,996

**Number of references:** 45

**Number of tables and/or figures:** 8

**Number of videos:** 0

## Abstract

*Objective:* Surgery for spinal deformity has the potential to improve pain, disability, function, self-image, and mental health. These surgeries carry significant risk and require careful selection, optimization, and risk assessment. Epigenetic clocks are age-estimation tools derived by measuring methylation patterns of specific DNA regions. The study of biological age in the adult deformity population has the potential to shed insight on the molecular basis of frailty and improve current risk assessment tools.

*Methods:* Adult patients undergoing deformity surgery were prospectively enrolled. Preoperative whole blood was used to assess epigenetic age and telomere length. DNA methylation patterns were quantified and processed to extract 4 principal component (PC)-based epigenetic age clocks (PC Horvath, PC Hannum, PC PhenoAge, and PC GrimAge) and the instantaneous pace of aging (DunedinPACE). Telomere length was assessed using both qPCR (T/S ratio) and methylation-based telomere estimator (PC DNAmTL). Patient demographic and surgical data included age, BMI, American Society of Anesthesiology (ASA) classification, and Charlson Comorbidity Index (CCI), Adult Spinal Deformity Frailty Index (ASD-FI), Edmonton Frail Score (EFS), Oswestry Disability Index (ODI), and Scoliosis Research Society-22r (SRS-22). Medical or surgical complications within 90 days of surgery were collected. Spearman correlations and log-odd ratios derived from linear regression analyses, adjusted for gender and BMI, were performed.

*Results:* Eighty-six patients were enrolled with mean age of 65 years and 46 women (54%). All patients underwent a posterior fusion with a mean of 11 levels fused and 35 3-column osteotomies (41%). Among epigenetic clocks, DunedinPACE showed a significant association with ASD-FI, EFS, ASD-FI, and SRS-22 – higher pace of aging was associated with worse frailty and disability scores. PC PhenoAge showed significant associations with EFS, ASD-FI, and ODI. PC GrimAge showed significant associations with EFS and ASD-FI. Among telomere measurements, PC DNAmTL was associated with CCI. There was a significant association between increased pace of aging by DunedinPACE and postoperative complications.

*Conclusions:* DunedinPACE showed significant associations with markers of frailty (EFS, ASD-FI), disability (ODI, SRS-22), and postoperative complications. These data suggest a role for aging biomarkers as components of surgical risk assessment. Integrating biological age into current risk calculators may improve their accuracy and provide valuable information for patients, surgeons, and payers.

## Introduction

Surgery for adult spinal deformity has increased dramatically over the past decade – both in volume and complexity.<sup>30,44</sup> Postoperative complications, readmissions, and reoperations have a negative impact on outcome and significantly increase cost.<sup>8,45</sup> As the number of operations performed rises with a growing aging population, there is a pressing need for improved risk assessment using a quantitative, biomarker-based approach.

Early instruments for risk assessment were relatively crude and stratified patients based on general health status.<sup>23</sup> Subsequent efforts integrated specific comorbidity data to quantify risk, such as 10-year mortality.<sup>7</sup> More recent work has focused on developing disease-specific and procedure-specific instruments to estimate cost, outcomes, and complications.<sup>33-37</sup>

Frailty assessments are an important part of the preoperative assessment and while definitions vary, frailty typically refers to a state of increased vulnerability to due to an accumulation of health deficits.<sup>25,38</sup> Almost all risk assessment tools recognize the importance of chronological age, however the aging process is complex and reflects both genetic and environmental factors.<sup>17</sup> An ideal risk assessment biomarker would include elements of chronologic age, biological age, and physiologic reserve. Epigenetic clocks are derived from specific DNA methylation patterns and account for both chronological and biological age of the source DNA.<sup>15</sup> More advanced clocks utilize serum markers to incorporate biological data or historical cohort datasets to generate clocks capable of estimating the pace of aging.<sup>2,20</sup> In this study, we used preoperative

whole blood to assess the utility of epigenetic clocks and investigated correlations with comorbidity burden, frailty, disability, and early postoperative complications.

## Methods

### *Patient collection*

Adult patients (over 18 years of age) undergoing surgery for spinal deformity were prospectively enrolled. Cases involving trauma, tumor, or infection were excluded. All activities were approved by the Committee on Human Research (CHR), our institutional review board (CHR #15-17095). Demographics including age, gender, body mass index (BMI), Anesthesia Society of America (ASA) classification,<sup>39</sup> Charlson comorbidity index (CCI),<sup>7</sup> adult spinal deformity frailty index (ASD-FI),<sup>25</sup> Edmonton frail scale (EFS), Oswestry Disability Index (ODI), and Scoliosis Research Society (SRS)-22r were collected. Surgical variables including the use of a staged (anterior-posterior) approach, number of levels fused, estimated blood loss (EBL), use of three-column osteotomy (3CO), and length of stay were also collected. Postoperative complications (either medical or surgical) within 90 days from surgery were included.

### *Epigenetic analysis*

Whole blood was acquired and stored at -80°C prior to being shipped to TruDiagnostic Inc. (Lexington, KY) for DNA methylation analysis. Briefly, 500 ng of DNA was extracted from whole blood and bisulfite converted using the EZ DNA Methylation kit (Zymo Research) according to the manufacturer's instructions. Bisulfite-converted DNA samples were randomly assigned to a chip well on the Infinium

HumanMethylationEPIC BeadChip, amplified, hybridized onto the array, stained, washed, and imaged with the Illumina iScan SQ instrument to obtain raw image intensities. Raw image intensities in the form of IDAT files were processed per chip using the minfi pipeline and normalized via the Sesame R package. To limit the number of batch effects caused by processing multiple bead chips, individual bead chips were processed at a time to generate normalized beta values as previously described (Corley et al. 2022). Epigenetic age estimates were calculated by using sesame processed and normalized beta values inputted into a custom R script to calculate 5 principal component based epigenetic clocks, available via Github (<https://github.com/MorganLevineLab/PC-Clocks>).<sup>12</sup>

We assessed multiple epigenetic clocks including two trained by chronological age: Horvath multi-tissue clock (referred to as PC Horvath) and Hannum clock (referred to as PC Hannum).<sup>11</sup> Both utilize DNA methylation values to derive a predicted age originally trained against chronological age. Three additional clocks were utilized: 1) The phenotypic clock PhenoAge, referred to as PC PhenoAge, was trained on a phenotypic age score derived by nine serum biomarkers plus chronological age to predict all-cause mortality; 2) The time to death mortality predictor GrimAge, referred to as PC GrimAge, was trained using 12 age-related plasma biomarkers, smoking pack-years, and trained to time until death; 3) The pace of aging clock, referred to as DunedinPACE, was derived using a prospective longitudinal cohort study.<sup>1-3</sup> The methylation-based telomere length estimator, referred to as DNAmTL, was also utilized in this study.<sup>22</sup> To account for variation driven by the range of chronological ages observed within our cohort, we calculated epigenetic age acceleration of the PC Horvath, PC Hannum, PC

PhenoAge, and PC GrimAge clocks, which is the residual of each clock measure regressed on chronological age. This adjustment was not needed for DunedinPACE, PC DNAmTL, and T/S ratio as these measures are not linked to chronological age measures.

### *Telomere length analysis*

Preoperative whole blood was acquired and stored at -80°C and telomere length assessed using quantitative polymerase chain reaction (qPCR) as previously described.<sup>6,21</sup> Genomic DNA was extracted from whole blood stored using the QIAamp mini DNA kit (QIAGEN, cat# 51106). The telomere qPCR primers are tel1b [5'-CGGTTT(GTTTGG)5GTT-3'], used at a final concentration of 100 nM, and tel2b [5'-GGCTTG(CCTTAC)5CCT-3'], used at a final concentration of 900 nM. The single-copy gene (human beta-globin) qPCR primers are hbg1 [5'-GCTTCTGACACA ACTGTGTTCACTAGC-3'], used at a final concentration of 300 nM, and hbg2 [5'-CACCAACTTCATCCACGTTCCACC-3'], used at a final concentration of 700 nM. The final reaction mix consisted of: 20 mM Tris-hydrochloride, pH 8.4; 50 mM potassium chloride; 200 µM each deoxyribonucleotide triphosphate; 1% dimethyl sulfoxide; 0.4x SYBR green I; 22 ng Escherichia coli DNA; 0.4 Units of platinum Taq DNA polymerase (Invitrogen Inc., Carlsbad, CA), and 6 ng of genomic DNA per 11 microliter reaction. A 3-fold serial dilution of a commercial human genomic DNA containing 26, 8.75, 2.9, 0.97, 0.324 and 0.108ng of DNA was included in each PCR run as the reference standard. The quantity of targeted templates in each sample was determined relative to the reference DNA sample by the maximum second derivative

method in the Roche LC480 program. The reaction was carried out using a Roche LightCycler 480 in 384-well plates, with triplicate wells for each sample. Dixon Q test was used to exclude outliers from the triplicates. The average of the T and S triplicate wells after outlier removal was used to calculate the T/S ratio for each sample. The T/S ratio for each sample was measured twice. When the duplicate T/S value and initial value varied by more than 7%, the sample was run a third time and the two closest values will be reported. Out of the 43 samples, 5 were assayed for the third time. The average inter-assay coefficient variation (CV) of the duplicate value is  $2.1\% \pm 1.5\%$ .

Relative telomere length was expressed as a ratio of telomere to single-copy gene abundance (T/S ratio or T/S) from peripheral blood mononuclear cell (PBMC) genomic DNA. T/S were converted to base pairs (bp) using comparisons of T/S ratios and bp determined by Southern Blot analysis of DNA samples from the human fibroblast IMR90 cultured and harvested at different time points.<sup>9</sup> Differences in cellular age based on telomere length were estimated using an attrition rate of 25 bp/year.<sup>28</sup>

### *Statistical analysis*

Statistical analysis was performed using the software R 4.1. Epigenetic and covariate variables were summarized depending on the nature of the metric. All continuous variables were summarized by the mean and standard deviation (SD), while categorical variables were described as count and percentages. Statistical analyses between categorical groups and continuous variables were conducted using the Wilcoxon-rank sum test and unadjusted p-values were reported. Similarly, Kruskal-Wallis H tests were also reported when testing the hypothesis that at least one



categorical variable showed significant difference among the groups. Statistical tests of associations between two continuous variables or between an ordinal and continuous variable were estimated using Spearman correlations. Spearman correlation and p-values were calculated using the `cor.test()` function in R.

Gender and BMI adjusted testing of association between continuous and/or ordinal covariate variables and epigenetic clocks were estimated by gaussian-identity link family linear model, using the `glm()` function in R. To allow for cross-clock comparisons, all clock and telomere outputs were scaled to a mean of 0 and a standard deviation of 1. Gender and BMI were added as fixed effects to adjust for differences in based on these outputs. The full model in R is represented as: `covariate ~ epigenetic/telomere estimate + sex + BMI`. Results are represented as the beta coefficient and 95% confidence interval. Statistical significance was defined as  $p < 0.05$ .

## Results

### *Patient demographics and surgical characteristics*

A total of 86 patients were enrolled. Mean age was 65 years (range 37 – 84) with 46 women (53.5%). Mean BMI was 28.8 (range 16.4 - 42.2). Mean preoperative ODI was 48% and mean total SRS-22r score was 3.5. ASA classification distribution was as follows: 2 class 1 (2.3%), 43 class 2 (50.0%), 41 class 3 (47.7%). Mean ASD-FI was 0.217 with distribution as follows: 55 not frail (64.0%), 29 frail (33.7%), 2 severely frail (2.3%). Demographic data are summarized in Table 1.

Among 86 total patients, 13 (15.1%) had cervical or cervicothoracic deformities, while 73 (84.9%) had thoracolumbar deformities. All patients underwent a posterior

approach and 40 patients (46.5%) underwent a combined anterior-posterior procedure. Mean number of levels fused anteriorly was 2 with mean EBL of 151 ml. Mean number of levels fused posteriorly was 11 with mean EBL of 1,581 ml. 35 patients (40.7%) underwent 3CO. Mean length of stay was 11 days. These surgical data are summarized in Table 1.

#### *Correlation between chronological age and epigenetic age and telomere metrics*

We sought to establish whether epigenetic age and telomere length estimates correlated to the chronological age of individuals in the cohort. We observe that 5 epigenetic clocks trained to chronological showed strong ( $\rho > 0.7$ ) and statistically significant correlations to the reported chronological ages. Both biological clocks demonstrated the strongest correlations (PC PhenoAge Spearman = 0.86, PC GrimAge; Spearman = 0.82). The phenotypic pace of aging clock, DunedinPACE reported weak, and insignificant correlation to chronological age ( $\rho = 0.12$ ,  $p = 0.29$ ). DNAmTL showed moderately inverse correlations to chronological age ( $\rho = -0.57$ ,  $p = 8.4e-09$ ), while T/S showed weak negative correlation ( $\rho = -0.19$ ) that was not statistically significant ( $p = 0.076$ ). These data are summarized in Figure 1. We compared the two telomere length measurement instruments DNAmTL and T/S to assess for correlations and identified a weak, but statistically significant relationship ( $\rho = 0.23$ ,  $p = 0.034$ ).

#### *Correlation with comorbidity burden*

To assess for correlation between epigenetic age and comorbidity burden, we compared Charlson comorbidity index (CCI) scores across 5 epigenetic clocks and two

measurements of telomere length (DNA mTL and T/S). All epigenetic clocks (PC Hannum, PC Horvath, PC PhenoAge, PC GrimAge, and DunedinPACE) showed no significant association between increasing CCI scores and epigenetic age ( $p > 0.05$ ). Pair-wise comparisons between groups 1-7 relative to 0 showed some significant differences among the PC Hannum (Group 2 vs. Group 0:  $p < 0.05$ , Group 4 vs. Group 0:  $p < 0.01$ ) and PC Horvath (Group 2 vs Group 0:  $p < 0.05$ , and Group 4 vs Group 0:  $p < 0.05$ ), however it was not consistent. A baseline analysis of CCI association to chronological age was performed and showed a significance of higher CCI values with older chronological ages ( $p = 5.7e-09$ ). This was not surprising since chronological age is a component of the CCI score. DNAmTL showed a significant, inverse relationship between overall telomere length and CCI score ( $p = 5.4e-5$ ), which was not observed with T/S ( $p = 0.45$ ). These data are summarized in Figure 2.

### *Assessment of frailty*

We sought to assess for associations between epigenetic age and frailty using both the adult spinal deformity frailty index (ASD-FI) and Edmonton frail scale (EFS). Spearman correlations were calculated across chronological age, epigenetic clocks, and telomere estimates, under the expectation that older epigenetic age was associated with higher frailty scores. Only DunedinPACE showed significant, and positive, correlation with ASD-FI DunedinPACE ( $\rho = 0.38$ ,  $p < 0.00034$ ), whereas PC PhenoAge approached, but did not pass, the significance threshold ( $\rho = 0.2$ ,  $p = 0.068$ ). There was no significant correlation between chronological age and ASD-FI. These data are summarized in Figure 3A-H.

To better assess the association between ASD-FI and the epigenetic and telomere measures, generalized gaussian regression models were generated to identify the average increase in ASD-FI score per standard deviation (SD) of epigenetic age or telomere measure change. The pace of aging clock (DunedinPACE) showed significant associations with ASD-FI: frailty score increased by 0.0429 per 1-SD increase in DunedinPACE (95% CI: 0.0303 – 0.0555,  $p = 0.001$ , Table 2). However, the PC PhenoAge clock showed significance ( $p = 0.0357$ ), as the ASD-FI score increased an average of 0.0269 for each 1-SD change of PC PhenoAge, suggesting that accounting for BMI and Sex improved resolution in age association (Table 2). Conversely, the methylation based DNAmTL measure failed to retain significance ( $p = 0.0508$ ,  $B = -0.0088$ , 95% CI: -0.0219 - -0.0042, Table 2). These data are shown in Figure 3I.

Analysis of the Edmonton frail scale (EFS) demonstrated a significant correlation with only DunedinPACE ( $\rho = 0.21$ ,  $p = 0.049$ ) and PC PhenoAge ( $\rho = 0.22$ ,  $p = 0.044$ ). Linear regression analysis after integrating gender and BMI as fixed effect variables corroborated this finding, with DunedinPACE shown as the sole epigenetic clock to demonstrate significant association to the EFS; on average, the model suggests that a score increase of 0.6975 per 1-SD increase in DunedinPACE (95% CI: 0.4028 – 0.9921,  $p = 0.0203$ , Table 2). These data are summarized in Figure 3J-R.

### *Assessment of disability*

We compared the epigenetic clocks and telomere length measurements with Oswestry Disability Index (ODI). No epigenetic age measure, or telomere measure, showed significant correlation to ODI; however both DunedinPACE ( $\rho = 0.2$ ,  $p =$

0.066) and T/S ( $\rho = 0.21$ ,  $p = 0.052$ ) demonstrated a weak association with ODI that trended towards significance. However, after adjusting for gender and BMI, linear regression analysis did not identify any significant associations between ODI to any of the measures calculated, including DunedinPACE. These data are summarized in Figure 4.

We also assessed the association between preoperative SRS-22 total score, a well-validated instrument for patients with adult spinal deformity. Among all epigenetic predictors and telomere metrics assessed, DunedinPACE significant, and weakly positive association to SRS-22 preop score (DunedinPACE:  $\rho = 0.25$ ,  $p = 0.025$ ). PC PhenoAge approached significance but did not pass the threshold ( $\rho = 0.21$ ,  $p = 0.055$ ). Conversely, chronological age showed a significant negative correlation to SRS-22 score ( $\rho = -0.25$ ,  $p = 0.021$ ). The association between these two metrics to SRS-22 were further confirmed as regression modelling DunedinPACE and PC PhenoAge to overall SRS score (adjusting for Sex and BMI) retained significance (DunedinPACE:  $p = 0.0097$ , PC PhenoAge:  $p = 0.0335$ , Table 2), and reported an overall SRS-22 score increase of 0.1737 and 0.1364 SRS-22 score per 1-SD increase of DunedinPACE and PC PhenoAge, respectively. Furthermore, chronological age showed a significant association ( $p = 0.0248$ ), with overall SRS-22 scores decreasing by -0.0140 (95% CI: -0.0202 - -0.0079) per 1-SD increase of chronological age. Surprisingly, PC GrimAge, which did not show significance within the correlation analysis ( $\rho = 0.15$ ,  $p = 0.16$ ), retained significance with the regression model, with overall SRS-22 scores showing an average increase of 0.1640 per 1-SD of the PC GrimAge age (95% CI: 0.0956 – 0.2324,  $p = 0.0188$ , Table 2). These data are summarized in Figure 5.

### *Association of biological age with postoperative complications*

All patients had at least 90-day follow-up to identify the presence of an early medical or surgical complication. We compared patients with any complication to those without and found no significant difference in age, gender, BMI, or preoperative ODI or SRS-22. There were similar patterns of deformity location, use of combined anterior-posterior approaches, number of levels fused, and use of 3CO. There was a higher portion of patients with ASA classification score of 3 in the complication group (61.9% vs. 34.1%,  $p=0.033$ ). CCI scores were not significantly different (3.0 vs. 2.4,  $p=0.107$ ). Frailty scores, either by ASD-FI or EFS, were also similar between groups. Among all epigenetic clocks and telomere length assessments, only DunedinPACE showed a significant difference, with an increased pace of aging in the complication group (1.09 vs. 1.03,  $p = 0.034$ ). These data are summarized in Table 3.

### **Discussion**

As the aging demographic increases, patients with spinal deformities will seek improved quality of life through surgical intervention. An important strategy for dealing with this influx of complex patients is through advanced risk stratification. These tools are particularly critical for adult deformity surgery given that these are in many cases elective, quality of life surgeries with high costs and a cost-effectiveness model that is highly sensitive to complications and reoperation.<sup>5,13,24</sup> Future tools that integrate patient physiology, biomarkers, and surgical invasiveness will allow surgeons to better quantify and predict surgical risk. This has a number of implications, most importantly improved

and accurate informed consent. Surgeons may also choose to tailor their surgical plan, i.e. decrease the invasiveness of a patient with unacceptable preoperative risk.

Furthermore, given increased scrutiny over the cost of deformity surgery, it will be important to convey patient-specific risk assessments to both hospital administration and payers.

For context, it is useful to briefly review the use of risk assessment tools in the evaluation of surgical patients. The Anesthesia Society of America (ASA) classification was a simple stratification instrument used to improve communication between physicians and provide a rough assessment of overall health. Subsequent efforts to expand beyond risk stratification into risk quantification include the Charlson comorbidity index (CCI), which estimates all-cause mortality based on comorbidities and although not specifically designed for surgical patients, was found useful in predicting survival and outcomes for select surgical interventions.<sup>10</sup> The American College of Surgeons National Surgery Quality Improvement Program (ACS-NSQIP) surgical risk calculator was developed using a multicenter cohort across multiple surgical specialties to estimate outcomes such pneumonia, surgical site infection, and mortality.<sup>4</sup>

In recent years, risk calculators have been developed specifically for spine surgery. SpineSage was built using a single center, prospective registry of nearly 1,500 patients.<sup>19</sup> It uses a combination of comorbidity and surgical invasiveness to predict the risk of major medical complications with a receiver operator curve (ROC) characteristic of 0.81. The spine Risk Assessment Tool (RAT) incorporates comorbidity data with preoperative diagnosis, surgical approach, and number of levels to estimate risk of medical and surgical complications.<sup>41</sup> Additional work by the International Spine Study

Group and European Spine Study Group has led to the development of predictive models that can quantify the risk of postoperative complications, readmissions, and reoperations specifically for adult deformity patients.<sup>29</sup> Newer calculators can estimate likelihood of reaching minimal clinically important difference and spine-specific complications such as pseudarthrosis and proximal junctional failure.<sup>33-35</sup>

Aging is a complex process influenced by both genetic and environmental factors. There are limitations to chronological age since the aging process varies across individuals and even between organ systems within the same individual.<sup>18,32</sup> Frailty has been popularized to help recognize vulnerability to stress, injury, or surgery.<sup>25,26</sup> One limitation of frailty tools are that they do not provide quantitative measurements of biophysical age or physiologic reserve. Biomarkers represent an attractive tool for estimating such parameters, particularly with respect to biological and cellular age. The most common techniques include epigenetic clocks, telomere length, transcriptomics, proteomics, and metabolomic age estimators.<sup>15</sup> Epigenetic age is unique in its ability to account for both chronological and biological age. First-generation clocks were based on saliva and focused on single-tissue aging. Subsequent clocks provide estimates for multiple tissue types and organ systems using methylation patterns across distinct DNA regions.<sup>14,40</sup> Newer epigenetic clocks integrate laboratory values such as albumin, creatinine, and C-reactive protein as surrogates of organ function and systemic inflammation.<sup>20</sup> Other epigenetic clocks have used data from longitudinal cohort studies to provide estimates of the pace of aging.<sup>2</sup> Biological age from epigenetic clocks has the potential to provide a more accurate assessment than chronological age alone,



therefore these metrics may provide a useful adjunct to current risk calculators.

Unfortunately, aging biomarkers are not utilized by any current risk stratification tools.

There are few studies investigating associations between biological age and surgery or postoperative complications. In a study of obese patients undergoing bariatric surgery, Jongbloed et al. identified a transient increase in telomere length at 6 months, that was lost at 12 months, suggesting that certain aging biomarkers are dynamic.<sup>16</sup> In a similar population of patients undergoing gastric bypass, Morton et al. found that patients with high levels of low-density lipoprotein (LDL) and C-reactive protein (CRP) had an increase in telomere length at 1-year.<sup>27</sup> These data reinforce other findings that aging is a dynamic and variable process, and furthermore suggest that high-risk patients, or those with the most severe disease burden, may benefit most from lifestyle changes or surgical intervention. Additionally, recent work from our group has shown that shorter telomere length may correlate with an increased risk of postoperative complications in adults undergoing deformity surgery.<sup>31</sup> Taken together, these data suggest a potentially important role for biological age in the evaluation and treatment of surgical ailments.

While the majority of the analyses performed in this study were conducted using preoperative frailty and disability scores, individuals exhibiting complications within 90 days of surgery showed overall increases in their pace of aging. It is important to note the epigenetic signal gathered from DunedinPACE was sensitive to capture the increase in overall aging in the complication group, which was not observed in any other biologically or chronologically trained algorithm, or with any telomere estimation. These findings are significant as it adds upon the growing evidence suggesting the clinical

utility of the DunedinPACE measure. A recent randomized controlled trial (CALERIE) of non-obese individuals showed DunedinPACE as the only epigenetic clock which exhibited a difference of 0.04 DunedinPACE units in individuals undergoing 25% caloric restriction, compared to those that did not undergo calorie restriction.<sup>43</sup> These results suggest that DunedinPACE is a high utility measure for geroscience-based interventions and with high clinical value. Consistent with these findings, the results presented in this manuscript demonstrate significant associations between DunedinPACE and preoperative frailty (ASD-FI and EFS), disability (SRS-22), and postoperative complications. Patients with a postoperative complication had higher preoperative DunedinPACE values (0.06 units,  $p = 0.03$ ), which is greater than the 0.04 units detected in the CALERIE trial. The findings presented here suggest a clinical role for DunedinPACE in improving preoperative surgical risk calculators.

A recent study investigated the association between frailty and epigenetic clock cohorts among a Canadian Longitudinal Study cohort.<sup>42</sup> Using a different frailty index predictor among a larger cohort, the authors of this study identified GrimAge as exhibiting the strongest association to frailty, followed by the original DunedinPoAm38 measure.<sup>1</sup> We recapitulate the findings of the newer DunedinPACE measure, which showed significant association between the both ASDFI and Edmonton Frailty Scale. However, we did not observe the same recapitulation of the GrimAge association to both frailty indices, nor the significant association of PhenoAge to the ASD-FI frailty index. Potential explanations include our utilization of an updated measure of the epigenetic clocks, which are trained to principal components representing groups of similarly methylated CpGs, rather than individual CpGs as in the Canadian cohort. As

the usage of principal components has been shown to improve technical consistency among replicates, and improve predictions and associations to outcome variables,<sup>12</sup> we believe that these clocks represent reliable measures of epigenetic age outputs to identify associations to frailty.

In summary, we present the results of epigenetic analysis on a prospective cohort of adult deformity patients. We show correlation of epigenetic age with estimates of comorbidity burden, frailty, and disability. Although limited by cohort size, these data provide impetus to further investigate the role of aging biomarkers as a component of risk stratification in high-risk surgical procedures.

## **Conclusion**

Risk calculators will play an increasingly important role in the future of healthcare. In this pilot study of 86 adult deformity patients, we demonstrate use of epigenetic clocks to identify novel associations with comorbidity burden, frailty scores, and disability. More data are needed, however there is compelling rationale to suggest that utilization of biological age may improve the prediction accuracy of current risk calculators.

## References

1. Belsky DW, Caspi A, Arseneault L, Baccarelli A, Corcoran DL, Gao X, et al: Quantification of the pace of biological aging in humans through a blood test, the DunedinPoAm DNA methylation algorithm. **Elife** **9**, 2020
2. Belsky DW, Caspi A, Corcoran DL, Sugden K, Poulton R, Arseneault L, et al: DunedinPACE, a DNA methylation biomarker of the pace of aging. **Elife** **11**, 2022
3. Belsky DW, Caspi A, Houts R, Cohen HJ, Corcoran DL, Danese A, et al: Quantification of biological aging in young adults. **Proc Natl Acad Sci U S A** **112**:E4104-4110, 2015
4. Bilimoria KY, Liu Y, Paruch JL, Zhou L, Kmiecik TE, Ko CY, et al: Development and evaluation of the universal ACS NSQIP surgical risk calculator: a decision aid and informed consent tool for patients and surgeons. **J Am Coll Surg** **217**:833-842 e831-833, 2013
5. Bonano J, Cummins DD, Burch S, Berven SH, Deviren V, Ames CP, et al: Economic Impact of Revision Operations for Adjacent Segment Disease of the Subaxial Cervical Spine. **J Am Acad Orthop Surg Glob Res Rev** **6**, 2022
6. Cawthon RM: Telomere measurement by quantitative PCR. **Nucleic Acids Res** **30**:e47, 2002
7. Charlson ME, Pompei P, Ales KL, MacKenzie CR: A new method of classifying prognostic comorbidity in longitudinal studies: development and validation. **J Chronic Dis** **40**:373-383, 1987

8. Deyo RA, Mirza SK, Martin BI, Kreuter W, Goodman DC, Jarvik JG: Trends, major medical complications, and charges associated with surgery for lumbar spinal stenosis in older adults. **JAMA** **303**:1259-1265, 2010
9. Farzaneh-Far R, Lin J, Epel E, Lapham K, Blackburn E, Whooley MA: Telomere length trajectory and its determinants in persons with coronary artery disease: longitudinal findings from the heart and soul study. **PLoS One** **5**:e8612, 2010
10. Froehner M, Koch R, Litz R, Heller A, Oehlschlaeger S, Wirth MP: Comparison of the American Society of Anesthesiologists Physical Status classification with the Charlson score as predictors of survival after radical prostatectomy. **Urology** **62**:698-701, 2003
11. Hannum G, Guinney J, Zhao L, Zhang L, Hughes G, Sada S, et al: Genome-wide methylation profiles reveal quantitative views of human aging rates. **Mol Cell** **49**:359-367, 2013
12. Higgins-Chen AT, Thrush KL, Wang Y, Minter CJ, Kuo PL, Wang M, et al: A computational solution for bolstering reliability of epigenetic clocks: Implications for clinical trials and longitudinal tracking. **Nat Aging** **2**:644-661, 2022
13. Horn SR, Passias PG, Hockley A, Lafage R, Lafage V, Hassanzadeh H, et al: Cost-utility of revisions for cervical deformity correction warrants minimization of reoperations. **J Spine Surg** **4**:702-711, 2018
14. Horvath S: DNA methylation age of human tissues and cell types. **Genome Biol** **14**:R115, 2013
15. Horvath S, Raj K: DNA methylation-based biomarkers and the epigenetic clock theory of ageing. **Nat Rev Genet** **19**:371-384, 2018

16. Jongbloed F, Meijers RWJ, JNM IJ, Klaassen RA, Dolle MET, van den Berg S, et al: Effects of bariatric surgery on telomere length and T-cell aging. **Int J Obes (Lond)** **43**:2189-2199, 2019
17. Jylhava J, Pedersen NL, Hagg S: Biological Age Predictors. **EBioMedicine** **21**:29-36, 2017
18. Khan SS, Singer BD, Vaughan DE: Molecular and physiological manifestations and measurement of aging in humans. **Aging Cell** **16**:624-633, 2017
19. Lee MJ, Cizik AM, Hamilton D, Chapman JR: Predicting medical complications after spine surgery: a validated model using a prospective surgical registry. **Spine J** **14**:291-299, 2014
20. Levine ME, Lu AT, Quach A, Chen BH, Assimes TL, Bandinelli S, et al: An epigenetic biomarker of aging for lifespan and healthspan. **Aging (Albany NY)** **10**:573-591, 2018
21. Lin J, Epel E, Cheon J, Kroenke C, Sinclair E, Bigos M, et al: Analyses and comparisons of telomerase activity and telomere length in human T and B cells: insights for epidemiology of telomere maintenance. **J Immunol Methods** **352**:71-80, 2010
22. Lu AT, Seeboth A, Tsai PC, Sun D, Quach A, Reiner AP, et al: DNA methylation-based estimator of telomere length. **Aging (Albany NY)** **11**:5895-5923, 2019
23. M. S: Grading of patients for surgical procedures. **Anesthesiology** **2**:281-284, 1941
24. McCarthy I, O'Brien M, Ames C, Robinson C, Errico T, Polly DW, Jr., et al: Incremental cost-effectiveness of adult spinal deformity surgery: observed

- quality-adjusted life years with surgery compared with predicted quality-adjusted life years without surgery. **Neurosurg Focus** **36**:E3, 2014
25. Miller EK, Neuman BJ, Jain A, Daniels AH, Ailon T, Sciubba DM, et al: An assessment of frailty as a tool for risk stratification in adult spinal deformity surgery. **Neurosurg Focus** **43**:E3, 2017
26. Miller EK, Vila-Casademunt A, Neuman BJ, Sciubba DM, Kebaish KM, Smith JS, et al: External validation of the adult spinal deformity (ASD) frailty index (ASD-FI). **Eur Spine J** **27**:2331-2338, 2018
27. Morton JM, Garg T, Leva N: Association of Laparoscopic Gastric Bypass Surgery With Telomere Length in Patients With Obesity. **JAMA Surg** **154**:266-268, 2019
28. Muezzinler A, Zaineddin AK, Brenner H: A systematic review of leukocyte telomere length and age in adults. **Ageing Res Rev** **12**:509-519, 2013
29. Pellise F, Serra-Burriel M, Smith JS, Haddad S, Kelly MP, Vila-Casademunt A, et al: Development and validation of risk stratification models for adult spinal deformity surgery. **J Neurosurg Spine**:1-13, 2019
30. Safaee MM, Ames CP, Smith JS: Epidemiology and Socioeconomic Trends in Adult Spinal Deformity Care. **Neurosurgery** **87**:25-32, 2020
31. Safaee MM, Lin J, Smith DL, Fury M, Scheer JK, Burke JF, et al: Association of telomere length with risk of complications in adult spinal deformity surgery: a pilot study of 43 patients. **J Neurosurg Spine** **38**:331-339, 2023
32. Schaum N, Lehallier B, Hahn O, Palovics R, Hosseinzadeh S, Lee SE, et al: Ageing hallmarks exhibit organ-specific temporal signatures. **Nature** **583**:596-602, 2020

33. Scheer JK, Oh T, Smith JS, Shaffrey CI, Daniels AH, Sciubba DM, et al:  
Development of a validated computer-based preoperative predictive model for pseudarthrosis with 91% accuracy in 336 adult spinal deformity patients.  
**Neurosurg Focus** 45:E11, 2018
34. Scheer JK, Osorio JA, Smith JS, Schwab F, Hart RA, Hostin R, et al:  
Development of a Preoperative Predictive Model for Reaching the Oswestry Disability Index Minimal Clinically Important Difference for Adult Spinal Deformity Patients. **Spine Deform** 6:593-599, 2018
35. Scheer JK, Osorio JA, Smith JS, Schwab F, Lafage V, Hart RA, et al:  
Development of Validated Computer-based Preoperative Predictive Model for Proximal Junction Failure (PJF) or Clinically Significant PJK With 86% Accuracy Based on 510 ASD Patients With 2-year Follow-up. **Spine (Phila Pa 1976)** 41:E1328-E1335, 2016
36. Scheer JK, Smith JS, Schwab F, Lafage V, Shaffrey CI, Bess S, et al:  
Development of a preoperative predictive model for major complications following adult spinal deformity surgery. **J Neurosurg Spine** 26:736-743, 2017
37. Sciubba D, Jain A, Kebaish KM, Neuman BJ, Daniels AH, Passias PG, et al:  
Development of a Preoperative Adult Spinal Deformity Comorbidity Score That Correlates With Common Quality and Value Metrics: Length of Stay, Major Complications, and Patient-Reported Outcomes. **Global Spine J** 11:146-153, 2021
38. Searle SD, Mitnitski A, Gahbauer EA, Gill TM, Rockwood K: A standard procedure for creating a frailty index. **BMC Geriatr** 8:24, 2008



39. Somani S, Capua JD, Kim JS, Phan K, Lee NJ, Kothari P, et al: ASA Classification as a Risk Stratification Tool in Adult Spinal Deformity Surgery: A Study of 5805 Patients. **Global Spine J** 7:719-726, 2017
40. Teschendorff AE, Menon U, Gentry-Maharaj A, Ramus SJ, Weisenberger DJ, Shen H, et al: Age-dependent DNA methylation of genes that are suppressed in stem cells is a hallmark of cancer. **Genome Res** 20:440-446, 2010
41. Veeravagu A, Li A, Swinney C, Tian L, Moraff A, Azad TD, et al: Predicting complication risk in spine surgery: a prospective analysis of a novel risk assessment tool. **J Neurosurg Spine** 27:81-91, 2017
42. Verschoor CP, Lin DTS, Kobor MS, Mian O, Ma J, Pare G, et al: Epigenetic age is associated with baseline and 3-year change in frailty in the Canadian Longitudinal Study on Aging. **Clin Epigenetics** 13:163, 2021
43. Waziry R, Ryan CP, Huffman KM, Kobor MS, Kothari M, Graf GH, et al: Effect of long-term caloric restriction on DNA methylation measures of biological aging in healthy adults from the CALERIE trial. **Nat Aging** 3:248-257, 2023
44. Weinstein JN, Lurie JD, Olson PR, Bronner KK, Fisher ES: United States' trends and regional variations in lumbar spine surgery: 1992-2003. **Spine (Phila Pa 1976)** 31:2707-2714, 2006
45. Whitmore RG, Stephen J, Stein SC, Campbell PG, Yadla S, Harrop JS, et al: Patient comorbidities and complications after spinal surgery: a societal-based cost analysis. **Spine (Phila Pa 1976)** 37:1065-1071, 2012

Table 1. Patient and surgical demographics

| Characteristic               | N=86          |
|------------------------------|---------------|
| Age                          | 65 ± 10 years |
| Female gender                | 46 (53.5%)    |
| BMI                          | 28.8 ± 5.5    |
| ASA classification           |               |
| 1                            | 2 (2.3%)      |
| 2                            | 43 (50.0%)    |
| 3                            | 41 (47.7%)    |
| Charlson comorbidity index   |               |
| Mean                         | 2.7 ± 1.6     |
| 0                            | 8 (9.3%)      |
| 1                            | 10 (11.6%)    |
| 2                            | 19 (22.1%)    |
| 3                            | 27 (31.4%)    |
| 4                            | 14 (16.3%)    |
| 5                            | 3 (3.5%)      |
| 6                            | 3 (3.5%)      |
| 7                            | 2 (2.3%)      |
| ASD-Frailty Index            |               |
| Mean score                   | 0.236 ± 0.122 |
| Not frail                    | 55 (64.0%)    |
| Frail                        | 29 (33.7%)    |
| Severely frail               | 2 (2.3%)      |
| Preop ODI                    | 48 ± 17%      |
| Preop SRS-22r                |               |
| Function                     | 3.5 ± 0.7     |
| Pain                         | 3.8 ± 0.9     |
| Self-image                   | 3.8 ± 0.7     |
| Mental health                | 2.7 ± 0.8     |
| Satisfaction/Dissatisfaction | 3.6 ± 1.0     |
| Total                        | 3.5 ± 0.6     |
| Deformity location           |               |
| Cervical/cervicothoracic     | 13 (15.1%)    |
| Thoracolumbar                | 73 (84.9%)    |
| Anterior stage               | 40 (46.5%)    |
| Anterior levels fused        | 2             |
| Anterior EBL                 | 151 ml        |
| Posterior levels fused       | 11            |
| Posterior EBL                | 1,581 ml      |
| 3-column osteotomy           | 35 (40.7%)    |

BMI: body mass index, ASA: Anesthesia Society of America, ASD: Adult spinal deformity, ODI: Oswestry Disability Index, SRS: Scoliosis Research Society

WITHDRAWN  
see manuscript DOI for details

Table 2. Associations between age metrics and clinical covariates

| <b>Model</b>        | <b>Age metric</b> | <b>Beta coefficient</b> | <b>95% CI</b>   | <b>Significance (p value)</b> |
|---------------------|-------------------|-------------------------|-----------------|-------------------------------|
| <b>ASD-FI</b>       | Chronological Age | 0.0002                  | -0.001 - 0.002  | 0.855                         |
|                     | DunedinPACE       | 0.0429                  | 0.030 - 0.056   | 0.001                         |
|                     | PC Hannum         | 0.0102                  | -0.003 - 0.023  | 0.429                         |
|                     | PC Horvath        | 0.0105                  | -0.002 - 0.023  | 0.410                         |
|                     | PC PhenoAge       | 0.0269                  | 0.014 - 0.040   | 0.036                         |
|                     | PC GrimAge        | 0.0298                  | 0.016 - 0.044   | 0.033                         |
|                     | PC DNAmTL         | -0.0088                 | -0.022 - 0.004  | 0.501                         |
|                     | TSR               | 0.0043                  | -0.009 - 0.017  | 0.738                         |
| <b>EFS</b>          | Chronological Age | -0.0103                 | -0.039 - 0.019  | 0.726                         |
|                     | DunedinPACE       | 0.6975                  | 0.403 - 0.992   | 0.020                         |
|                     | PC Hannum         | 0.2131                  | -0.078 - 0.504  | 0.466                         |
|                     | PC Horvath        | -0.0021                 | -0.291 - 0.287  | 0.994                         |
|                     | PC PhenoAge       | 0.4976                  | 0.210 - 0.786   | 0.088                         |
|                     | PC GrimAge        | 0.4093                  | 0.093 - 0.725   | 0.199                         |
|                     | PC DNAmTL         | -0.1771                 | -0.473 - 0.119  | 0.552                         |
|                     | TSR               | -0.4192                 | -0.708 - -0.131 | 0.150                         |
| <b>Preop ODI</b>    | Chronological Age | -0.1873                 | -0.355 - -0.020 | 0.268                         |
|                     | DunedinPACE       | 3.0637                  | 1.263 - 4.864   | 0.093                         |
|                     | PC Hannum         | 0.2402                  | -1.669 - 2.149  | 0.900                         |
|                     | PC Horvath        | 0.3839                  | -1.389 - 2.157  | 0.829                         |
|                     | PC PhenoAge       | 2.4976                  | 0.787 - 4.209   | 0.148                         |
|                     | PC GrimAge        | 1.8990                  | 0.024 - 3.774   | 0.314                         |
|                     | PC DNAmTL         | 1.7283                  | -0.018 - 3.475  | 0.325                         |
|                     | TSR               | 1.7328                  | 0.014 - 3.452   | 0.316                         |
| <b>Preop SRS-22</b> | Chronological Age | -0.014                  | -0.020 - -0.008 | 0.025                         |
|                     | DunedinPACE       | 0.1737                  | 0.108 - 0.239   | 0.010                         |
|                     | PC Hannum         | -0.0028                 | -0.075 - 0.069  | 0.969                         |
|                     | PC Horvath        | -0.0348                 | -0.102 - 0.032  | 0.605                         |
|                     | PC PhenoAge       | 0.1364                  | 0.073 - 0.199   | 0.034                         |
|                     | PC GrimAge        | 0.1640                  | 0.096 - 0.232   | 0.019                         |
|                     | PC DNAmTL         | 0.0915                  | 0.027 - 0.156   | 0.161                         |
|                     | TSR               | 0.0813                  | 0.017 - 0.145   | 0.207                         |

ASD-FI: Adult Spinal Deformity Frailty Index, EFS: Edmonton Frailty Score, ODI: Oswestry Disability Index, SRS: Scoliosis Research Society, Preop: Preoperative, PC: Principal Component, TSR: telomere to single gene ratio

Table 3. Comparison of patients with and without postoperative complications

| Characteristic               | Complications |            | p value |
|------------------------------|---------------|------------|---------|
|                              | None (n=44)   | Any (n=42) |         |
| Age (years)                  | 65            | 65         | 0.959   |
| Female gender                | 25 (56.8%)    | 21 (50.0%) | 0.526   |
| BMI                          | 27.6          | 30.0       | 0.047   |
| Preop ODI                    | 47%           | 48%        | 0.789   |
| Preop SRS-22r                |               |            |         |
| Function                     | 3.5           | 3.6        | 0.613   |
| Pain                         | 3.9           | 3.8        | 0.599   |
| Self-image                   | 3.7           | 3.8        | 0.499   |
| Mental health                | 2.7           | 2.7        | 0.945   |
| Satisfaction/dissatisfaction | 3.6           | 3.7        | 0.463   |
| Total                        | 3.4           | 3.5        | 0.633   |
| Deformity location           |               |            | 0.695   |
| Cervical/cervicothoracic     | 6 (13.6%)     | 7 (16.7%)  |         |
| Thoracolumbar                | 38 (86.4%)    | 35 (83.5%) |         |
| Anterior stage               | 25 (56.8%)    | 15 (35.7%) | 0.050   |
| Levels fused                 | 2.1           | 1.7        | 0.037   |
| EBL (ml)                     | 160           | 135        | 0.597   |
| Posterior levels fused       | 11.2          | 11.6       | 0.628   |
| Posterior EBL (ml)           | 1,495         | 1,670      | 0.370   |
| 3CO                          | 14 (31.8%)    | 21 (50.0%) | 0.086   |
| ASA class                    |               |            | 0.033   |
| 1                            | 1 (2.3%)      | 1 (2.4%)   |         |
| 2                            | 28 (63.6%)    | 15 (35.7%) |         |
| 3                            | 15 (34.1%)    | 26 (61.9%) |         |
| CCI score                    | 2.4           | 3.0        | 0.107   |
| ASD-FI score                 | 0.219         | 0.254      | 0.189   |
| Subgroup                     |               |            | 0.027   |
| Not frail                    | 34 (77.3%)    | 21 (50.0%) |         |
| Frail                        | 9 (20.5%)     | 20 (47.6%) |         |
| Severely frail               | 1 (2.3%)      | 1 (2.4%)   |         |
| Edmonton Frailty Score       | 4.4           | 4.5        | 0.879   |
| Subgroup                     |               |            | 0.555   |
| Not frail                    | 32 (72.7%)    | 30 (71.4%) |         |
| Vulnerable                   | 5 (11.4%)     | 5 (11.9%)  |         |
| Mild frailty                 | 3 (6.8%)      | 6 (14.3%)  |         |
| Moderate frailty             | 3 (6.8%)      | 1 (2.4%)   |         |
| Severe frailty               | 1 (2.3%)      | 0 (0%)     |         |
| Biological age               |               |            |         |
| DunedinPACE                  | 1.03          | 1.09       | 0.034   |
| PC Hannum (years)            | 68.98         | 69.06      | 0.615   |
| PC Horvath (years)           | 61.19         | 61.58      | 0.734   |

|                     |       |       |       |
|---------------------|-------|-------|-------|
| PC PhenoAge (years) | 65.00 | 66.51 | 0.350 |
| PC GrimAge (years)  | 76.92 | 77.64 | 0.324 |
| PC DNAmTL (kb)      | 6.86  | 6.85  | 0.591 |
| TSR                 | 0.835 | 0.824 | 0.744 |

BMI: body mass index, ODI: Oswestry disability index, SRS: Scoliosis Research Society, EBL: estimated blood loss, 3CO: three-column osteotomy, ASA: American Society of Anesthesiologists, CCI: Charlson comorbidity index, ASD-FI: adult spinal deformity frailty index, TSR: telomere to single gene ratio

WITHDRAWN  
see manuscript DOI for details

## Figure legends

Figure 1. Correlation of chronologic and biological age. Scatter plots showing trend line of best fit with standard errors, Spearman correlation (R), and significance (p-value). Epigenetic age estimates include PC Horvath (A), PC Hannum (B), PC PhenoAge (C), PC GrimAge (D), and DunedinPACE (E). Telomere estimates are reported in DNAmTL (F) and T/S ratio (G).

Figure 2. Comparison of biological age and Charlson comorbidity index (CCI). PC Hannum and PC Horvath were converted to accelerations and scaled. Wilcoxon-rank sum test was conducted between each CCI score 1 or greater and compared to the 0 group. Kruskal-Wallis p-value is reported. Single asterisk (\*) represents a significance of  $p < 0.05$ , double asterisk (\*\*) represents  $p < 0.01$ , triple asterisk (\*\*\*) represents  $p < 0.001$ , and four asterisks (\*\*\*\*) represents  $p < 0.0001$ .

Figure 3. Comparison of biological age with Adult Spinal Deformity Frailty Index (ASD-FI) and Edmonton Frail Scale (EFS). Scatter plots showing trend line of best fit with standard errors, Spearman correlation (R), and significance (p-value). Comparison of ASD-FI with chronological age (A) and epigenetic age acceleration estimates including DunedinPACE (B), PC Hannum (C), PC Horvath (D), PC PhenoAge (E), and PC GrimAge (F). Telomere length reported as DNAmTL (G) and T/S (H). Beta coefficients of the linear regression analysis are shown as forest plots (I), with the red line representing no significance and error bars represent the 95% confidence interval.

Comparison of EFS with chronological age (J) and epigenetic age acceleration estimates including DunedinPACE (K), PC Hannum (L), PC Horvath (M), PC PhenoAge (N), and PC GrimAge (O). Telomere length reported as DNAmTL (P) and T/S (Q). Beta coefficients of the linear regression analysis are shown as forest plots (R), with the red line representing no significance and error bars represent the 95% confidence interval.

Figure 4. Comparison of biological age and preoperative Oswestry Disability Index (ODI). Scatter plots showing trend line of best fit with standard errors, Spearman correlation (R), and significance (p-value). Comparison of ODI with chronological age (A) and epigenetic age acceleration estimates including DunedinPACE (B), PC Hannum (C), PC Horvath (D), PC PhenoAge (E), and PC GrimAge (F). Telomere length reported as DNAmTL (G) and T/S (H). Beta coefficients of the linear regression analysis are shown as forest plots (I), with the red line representing no significance and error bars represent the 95% confidence interval.

Figure 5. Comparison of biological age and preoperative Scoliosis Research Society 22 (SRS-22) score. Scatter plots showing trend line of best fit with standard errors, Spearman correlation (R), and significance (p-value). Comparison of SRS-22 with chronological age (A) and epigenetic age acceleration estimates including DunedinPACE (B), PC Hannum (C), PC Horvath (D), PC PhenoAge (E), and PC GrimAge (F). Telomere length reported as DNAmTL (G) and T/S (H). Beta coefficients of the linear regression analysis are shown as forest plots (I), with the red line representing no significance and error bars represent the 95% confidence interval.



# Chronological Age

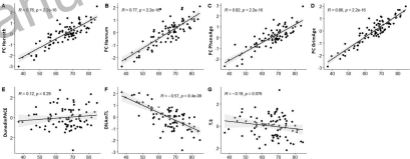

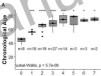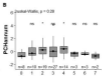

CCI

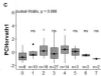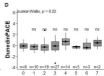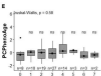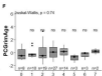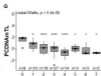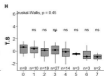

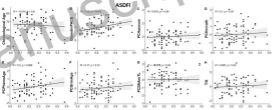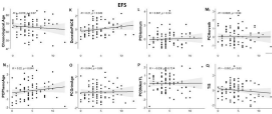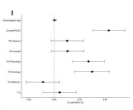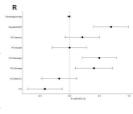

bioRxiv preprint doi: <https://doi.org/10.1101/2020.05.14.100000>; this version posted May 14, 2020. The copyright holder for this preprint (which was not certified by peer review) is the author/funder, who has granted bioRxiv a license to display the preprint in perpetuity. It is made available under aCC-BY-NC-ND 4.0 International license.

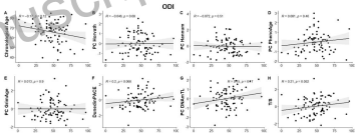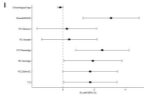

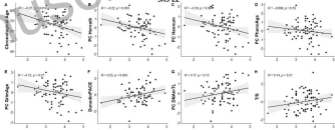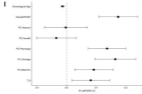

Source: https://medrxiv.org/content/medrxiv/early/2023/04/26/2023.04.23.23289001.full.pdf
